# Supplementary material for: Assessing Misophonia in Young Adults: Prevalence and Psychometric Validation of the MisoQuest Questionnaire
Source: Preprints.org preprint supplement (doi:10.20944/preprints202407.0955.v1), 2024-07-11
Supplement: Supplementary file 1 [file supplementary]

## Sheet: Planilha1
Subject	Gender	Birth date	Age	Do you agree to participate this survey?	Q1	Q2	Q3	Q4	Q5	Q6	Q7	Q8	Q9	Q10	Q11	Q12	Q13	Q14	Misoquest score
1	Male	#none	0	YES	1	1	1	1	1	4	4	3	1	1	3	2	3	3	29
2	Female	1995-03-26	28	YES	4	2	1	1	1	1	1	4	1	1	1	1	1	s	20
3	Female	2004-05-25	20	YES	4	3	2	4	1	4	4	1	5	5	4	5	1	4	47
4	Female	2004-10-20	18	YES	4	5	3	4	5	5	4	4	5	5	4	4	4	4	60
5	Male	1999-08-25	24	YES	1	2	2	2	1	2	3	2	3	2	2	2	3	3	30
6	Female	2005-11-04	18	YES	4	2	2	2	2	2	2	3	2	4	3	4	4	3	39
7	Female	2005-02-06	19	YES	4	1	1	1	1	4	4	5	4	4	4	4	2	2	41
8	Male	1995-05-19	28	YES	2	2	1	1	1	1	1	1	1	2	1	1	1	1	17
9	Female	1992-06-12	31	YES	2	4	2	2	4	2	3	2	2	3	2	2	2	4	36
10	Male	2008-01-25	16	YES	3	2	2	3	4	4	4	4	4	3	3	5	2	3	46
11	Male	1985-08-28	38	YES	4	1	1	4	1	1	3	1	1	2	1	1	3	1	25
12	Male	1998-02-05	25	YES	2	4	1	1	1	1	1	1	1	1	1	1	1	1	18
13	Female	2003-08-27	20	YES	3	2	2	4	4	2	2	2	3	3	3	4	5	2	41
14	Male	2003-06-17	20	YES	4	1	2	4	2	2	2	2	2	2	2	2	2	2	31
15	Male	1981-12-27	42	YES	2	3	1	2	1	2	2	2	4	2	3	1	1	1	27
16	Female	1989-04-05	34	YES	4	5	3	1	4	2	2	4	4	2	2	2	2	4	41
17	Female	1988-01-18	35	YES	4	3	3	2	2	2	2	2	2	2	2	2	2	2	32
18	Male	#none	0	YES	1	4	2	1	3	1	1	5	1	1	1	4	1	1	27
19	Female	2001-06-09	22	YES	1	1	1	1	1	4	4	1	1	2	1	2	1	1	22
20	#none	2005-04-09	19	YES	4	3	4	4	1	4	4	5	5	5	5	4	2	2	52
21	Female	2005-05-23	19	YES	4	4	2	2	1	4	3	4	5	5	4	5	1	4	48
22	Female	2004-01-30	20	YES	1	1	1	1	1	1	1	1	1	1	1	1	1	1	14
23	Female	2003-12-02	20	YES	1	2	1	1	1	2	1	1	1	1	1	2	1	1	17
24	Female	1998-12-29	24	YES	3	4	2	1	1	2	1	2	3	4	2	2	2	4	33
25	Female	1985-11-25	37	YES	4	4	4	2	2	4	2	2	4	4	2	4	2	2	42
26	Female	2004-07-13	19	YES	3	4	2	2	3	3	2	1	2	4	1	3	1	2	33
27	Female	1999-03-30	24	YES	4	2	3	2	2	4	3	2	3	3	2	4	2	3	39
28	Female	2006-02-19	18	YES	4	2	2	4	5	5	4	5	5	4	5	5	2	5	57
29	Female	2003-05-28	20	YES	4	3	3	3	2	3	4	2	2	5	3	4	2	4	44
30	Female	2003-02-19	21	YES	1	2	1	1	1	1	1	1	2	2	1	1	1	1	17
31	Female	2005-04-08	19	YES	3	3	2	1	1	2	1	1	2		4	4	3	4	31
32	Female	2003-12-29	19	YES	4	2	4	5	1	3	2	2	3	4	5	2	5	5	47
33	Female	2007-04-27	17	YES	2	1	1	1	1	2	2	2	2	1	2	1	1	1	20
34	Female	2008-04-30	16	YES	5	3	2	2	1	4	3	5	4	4	5	5	4	5	52
35	Female	2004-06-14	20	YES	3	4	4	3	2	4	4	2	4	2	3	4	3	4	46
36	Female	1988-11-18	34	YES	1	4	1	1	4	1	1	1	2	1	1	5	1	1	25
37	Female	2007-11-04	16	YES	2	2	2	2	2	4	3	4	5	4	3	2	2	2	39
38	Female	1999-05-24	24	YES	4	2	2	2	2	2	2	2	2	2	2	2	2	2	30
39	Female	1998-12-02	24	YES	2	5	1	1	1	5	1	3	1	1	5	4	1	3	34
40	Female	2000-04-17	23	YES	4	3	1	4	1	5	3	1	2	1	1	5	1	2	34
41	Female	2001-12-22	21	YES	5	5	4	1	3	2	3	2	2	3	3	3	2	3	41
42	Female	1980-08-24	43	YES	5	4	4	4	2	4	4	3	4	3	3	4	3	3	50
43	Male	2004-05-21	20	YES	4	3	2	4	4	4	3	2	5	3	3	4	3	4	48
44	Male	1998-08-06	25	YES	1	1	1	1	1	1	1	1	1	1	1	1	1	1	14
45	Male	2004-08-09	19	YES	4	3	4	3	3	3	3	5	4	5	5	3	4	4	53
46	Male	#none	0	YES	2	2	5	3	4	1	4	2	2	4	4	4	2	2	41
47	Female	2004-05-02	20	YES	2	2	2	3	1	2	3	3	1	1	1	1	1	1	24
48	Female	1994-01-08	29	YES	4	3	4	5	3	5	4	3	3	4	4	4	3	3	52
49	Female	1999-08-26	24	YES	5	4	5	4	4	3	5	3	5	5	4	5	3	5	60
50	Male	1999-12-13	23	YES	4	2	2	2	1	2	4	2	3	2	2	3	1	1	31
51	Female	2002-01-02	21	YES	2	4	4	2	2	4	4	1	2	4	4	4	1	1	39
52	Male	1996-01-02	28	YES	4	3	4	3	3	5	4	2	5	5	4	5	4	4	55
53	Male	2003-09-05	20	YES	5	2	1	1	2	2	2	1	5	2	2	1	1	1	28
54	Male	2001-08-17	22	YES	2	1	1	1	1	1	1	1	1	1	1	1	1	1	15
55	Male	2005-07-11	18	YES	4	2	1	1	1	1	1	1	1	4	2	1	1	2	23
56	Male	2005-01-31	19	YES	2	2	4	1	1	1	2	4	5	4	2	2	2	2	34
57	Male	1998-02-19	25	YES	1	1	1	1	1	1	1	1	1	1	1	1	1	1	14
58	Male	2003-10-30	20	YES	2	1	1	1	3	1	1	1	1	1	1	1	1	1	17
59	Male	2001-03-24	22	YES	1	4	4	1	1	4	1	1	1	5	1	5	1	1	31
60	Female	2005-04-02	19	YES	4	4	2	2	2	2	5	1	1	4	5	5	5	5	47
61	Female	2001-07-23	22	YES	1	3	1	1	2	1	2	1	1	2	2	1	1	2	21
62	Female	1998-07-14	25	YES	5	5	5	4	3	4	5	3	5	5	5	5	5	5	64
63	Female	2003-07-10	20	YES	1	3	1	1	1	1	1	1	4	1	1	1	1	1	19
64	Female	1999-03-30	24	YES	4	3	3	3	2	3	3	2	5	4	3	4	3	3	45
65	Female	2008-02-18	16	YES	1	1	5	3	1	5	1	1	1	5	1	5	1	1	32
66	Female	2003-09-08	20	YES	3	2	1	1	1	3	2	1	2	4	2	3	1	2	28
67	Female	2002-01-22	21	YES	4	4	4	2	3	2	3	2	4	4	2	4	2	3	43
68	Male	1998-08-07	25	YES	1	1	1	1	1	1	1	1	1	1	1	1	1	1	14
69	Male	1998-07-27	25	YES	1	1	1	2	2	4	4	1	5	4	2	4	1	2	34
70	Male	2001-10-24	21	YES	4	2	1	3	2	4	4	1	1	3	2	3	1	3	34
71	Male	2003-01-17	20	YES	4	3	2	1	1	2	1	1	1	2	1	2	1	1	23
72	Female	1998-04-14	25	YES	4	2	1	3	2	3	2	1	1	1	1	1	1	1	24
73	Female	2007-05-10	17	YES	5	3	5	4	4	3	3	4	4	4	4	4	4	5	56
74	Female	2004-01-12	20	YES	4	5	4	5	4	2	4	3	2	4	4	5	3	4	53
75	Female	1997-09-20	26	YES	1	2	1	1	3	4	1	4	5	5	5	2	4	4	42
76	Female	2006-09-19	17	YES	2	2	2	2	2	2	4	2	2	4	4	2	2	2	34
77	Female	2006-10-10	17	YES	4	1	1	4	1	1	1	1	4	4	1	4	4	1	32
78	Male	2002-11-29	20	YES	1	2	2	3	4	2	2	2	2	4	2	2	2	2	32
79	Male	1991-05-26	32	YES	1	2	1	2	4	4	3	4	4	4	3	4	2	5	43
80	Female	1981-04-05	43	YES	3	1	1	1	1	2	2	1	1	1	1	2	1	2	20
81	Female	2002-08-19	21	YES	5	4	5	5	3	5	4	4	3	3	5	5	3	3	57
82	Female	2004-02-29	20	YES	2	2	3	1	1	1	1	1	1	4	2	2	2	2	25
83	Female	2002-07-01	21	YES	1	1	1	1	1	3	2	2	3	2	2	3	2	2	26
84	#none	2003-12-01	20	YES	4	4	4	5	4	2	4	4	2	4	2	2	4	4	49
85	Female	2003-02-11	20	YES	2	4	3	4	4	2	4	5	5	4	2	2	5	2	48
86	Female	2003-10-06	20	YES	2	1	1	1	1	1	2	1	2	3	1	1	1	2	20
87	Male	2000-07-19	23	YES	3	1	1	2	1	1	1	1	1	1	1	1	1	1	17
88	Male	2007-09-08	16	YES	2	2	2	1	2	1	2	2	4	4	4	2	1	1	30
89	Female	2003-04-15	20	YES	2	2	4	4	3	5	4	1	1	4	2	4	1	1	38
90	Male	1996-03-30	27	YES	2	2	1	1	1	4	2	3		4	1	4	1	5	31
91	Female	1989-02-04	34	YES	4	3	4	3	2	3	4	3	4	4	3	4	3	4	48
92	Female	1998-04-20	25	YES	2	3	4	2	2	2	4	4	3	3	2	2	1	2	36
93	Male	1992-08-21	31	YES	5	1	3	5	5	1	3	5	5	5	1	1	1	1	42
94	Male	2002-12-30	20	YES	4	2	1	2	2	3	3	1	2	4	2	1	3	4	34
95	Male	2000-04-01	23	YES	4	1	3	4	1	4	2	1	4	4	5	2	1	1	37
96	Male	1999-10-26	23	YES	3	3	3	4	3	4	3	4	4	4	4	3	3	3	48
97	Female	1969-08-25	54	YES	2	1	2	1	1	2	2	2	2	2	2	1	2	2	24
98	Male	1979-12-07	44	YES	1	1	5	2	1	1	5	1	5	3	3	2	1	1	32
99	Male	1985-07-21	38	YES	3	3	2	2	1	1	1	1	1	1	2	1	2	1	22
100	Male	2000-03-11	23	YES	2	2	2	2	1	3	2	3	3	3	1	1	1	2	28
101	Male	2003-06-07	20	YES	1	2	1	1	1	2	1	2	2	4	1	1	2	2	23
102	Male	2007-09-27	16	YES	1	1	1	1	1	1	1	1	2	1	2	4		1	18
103	Female	2008-02-01	16	YES	3	2	3	2	2	4	2	4	4	4	4	4	2	2	42
104	Female	1995-12-21	27	YES	5	1	5	5	3	5	5	4	3	5	2	5	5	5	58
105	Female	1978-07-26	45	YES	2	2	2	2	2	2	2	2	2	2	2	2	2	2	28
106	Female	1988-09-10	35	YES	5	5	5	5	3	3	4	5	5	5	4	5	5	5	64
107	Male	1996-06-08	27	YES	4	1	3	4	1	4	2	1	1	3	1	2	1	4	32
108	Male	2004-04-30	20	YES	4	3	4	2	2	4	4	2	4	4	4	4	2	2	45
109	Male	2006-04-19	18	YES	2	2	4	2	2	2	2	2	2	2	2	2	2	3	31
110	Female	1995-09-13	28	YES	3	3	3	2	4	2	2	2	3	2	3	3	1	3	36
111	Female	1998-12-19	24	YES	4	3	5	5	5	5	5	2	2	5	2	5	2	2	52
112	Male	2004-06-25	20	YES	2	1	1	1	1	1	1	1	1	1	1	1	1	1	15
113	Male	1997-02-14	26	YES	4	1	1	5	2	1	5	4	4	5	4	5	2	2	45
114	Female	1979-03-02	44	YES	5	5	3	4	4	4	4	5	5	5	3	4	5	5	61
115	Male	1999-12-29	23	YES	5	5	4	2	4	2	4	4	4	4	4	2	4	2	50
116	Female	1999-08-28	24	YES	2	2	2	2	2	2	2	2	2	2	2	2	2	2	28
117	Female	2004-02-12	19	YES	3	2	2	2	1	2	2	2	4	3	2	2	2	2	31
118	Male	1998-12-16	24	YES	1	1	1	1	1	1	1	1	1	1	1	1	1	1	14
119	Male	1996-04-06	27	YES	3	3	3	2	1	4	1	1	2	3	4	1	1	1	30
120	Male	2002-09-05	21	YES	4	4	4	1	1	5	4	5	5	5	4	5	4	4	55
121	Male	2004-10-07	19	YES	4	2	4	2	4	3	4	2	1	4	1	4	1	1	37
122	Male	2006-03-21	18	YES	4	5	2	3	3	4	5	4	4	5	5	4	4	4	56
123	Female	1975-10-09	48	YES	4	4	4	2	1	2	2	2	2	2	4	3	4	2	38
124	Female	2005-02-15	18	YES	2	4	4	2	4	3	2	2	3	4	4	4	2	3	43
125	Female	2002-02-15	21	YES	5	4	3	4	3	3	3	1	4	4	3	2	2	4	45
126	Male	2000-09-24	23	YES	4	4	3	1	1	1	2	2	2	4	4	2	2	2	34
127	Male	2005-06-08	19	YES	4	2	2	2	2	4	4	3	3	4	4	4	2	3	43
128	Male	1995-03-31	28	YES	2	2	2	2	2	2	2	2	2	2	2	2	2	2	28
129	Male	1997-04-04	26	YES	2	2	1	1	1	2	2	3	3	3	2	2	2	2	28
130	Female	1994-08-24	29	YES	5	5	5	5	3	5	4	5	5	5	3	4	3	4	61
131	Female	2003-11-07	20	YES	2	2	4	2	2	2	4	1	1	5	5	2	1	1	34
132	Female	#none	0	YES	3	3	3	3	3	3	3	3	3	3	3	3	3	3	42
133	Female	2000-06-16	23	YES	3	4	3	4	4	4	3	2	2	3	3	2	3	2	42
134	Male	2003-06-09	20	YES	1	1	1	1	1	1	1	1	5	1	1	1	1	1	18
135	Male	2003-02-14	21	YES	4	4	5	3	1	4	3	5	5	5	5	5	3	5	57
136	Female	2004-12-28	19	YES	5	1	1	1	1	4	1	1	1	4	4	3	1	1	29
137	Female	2006-05-03	18	YES	4	3	2	3	2	3	4	3	3	4	2	4	3	2	42
138	Female	2006-10-27	17	YES	4	1	4	3	4	2	4	2	4	4	2	4	2	4	44
139	Female	2008-04-14	16	YES	4	4	2	3	2	3	4	2	5	4	3	4	3	4	47
140	Male	2000-06-21	23	YES	1	4	2	1	2	4	2	2	4	4	2	4	2	4	38
141	Male	2003-10-08	20	YES	3	3	3	3	3	3	3	3	3	3	3	3	3	3	42
142	Male	1996-05-17	27	YES	1	1	1	1	1	1	1	1	1	1	3	1	1	1	16
143	Male	2005-05-09	19	YES	2	2	1	3	2	2	2	3	3	4	4	3	3	2	36
144	Female	2004-09-03	19	YES	4	2	3	3	4	2	2	3	2	4	2	4	2	2	39
145	Male	2001-04-14	22	YES	1	1	1	1	1	1	1	1	1	1	1	1	1	1	14
146	Female	2004-10-18	19	YES	3	4	3	2	1	4	2	1	4	2	1	2	1	1	31
147	Male	2003-04-28	21	YES	3	3	1	3	2	3	2	1	2	2	1				23
148	Female	1998-04-23	25	YES	4	4	4	4	4	4	4	4	4	5	5	5	5	5	61
149	Male	1979-04-13	44	YES	2	3	4	3	2	4	3	2	2	2	3	3	2	4	39
150	Male	1978-07-04	45	YES	1	1	1	1	1	1	1	1	1	1	1	1	1	1	14
151	Male	2000-03-30	23	YES	4	4	5	4	3	2	4	2	4	4	5	5	4	2	52
152	Male	1998-04-26	25	YES	2	4	3	4	2	4	1	1	1	3	2	2	2	2	33
153	Male	2004-10-09	19	YES	1	2	1	2	1	2	1	2	4	2	3	1	1	1	24
154	Male	2001-02-10	22	YES	4	1	2	3	1	2	4	1	4	2	1	4	1	2	32
155	Male	2002-10-22	20	YES	2	2	2	2	3	2	2	2	3	2	2	3	2	3	32
156	Male	1998-09-08	25	YES	1	1	1	1	1	1	2	1	4	4	1	2	4	2	26
157	Male	1989-07-03	35	YES	1	1	3	1	1	4	1	1	2	1	1	2	5	4	28
158	Male	2007-02-08	17	YES	3	2	2	2	1	3	2	1	2	2	2	2	2	2	28
159	Male	2005-07-09	18	YES	1	1	1	1	1	1	1	1	1	1	1	1	1	1	14
160	Male	2003-05-15	21	YES	1	1	1	1	1	1	1	1	2	4	1	1	1	1	18
161	Male	2003-08-27	20	YES	4	3	3	3	3	3	5	4	5	4	5	4	3	4	53
162	Male	2004-03-23	19	YES	5	3	5	5	3	4	5	5	5	5	5	5	5	4	64
163	Male	2001-04-24	22	YES	2	2	2	2	2	4	3	2	3	2	2	4	2	2	34
164	Male	2007-03-31	17	YES	3	3	4	5	5	4	4	3	3	5	4	5	5	5	58
165	Male	#none	0	YES	1	1	1	1	1	2	1	1	1	1	1	2	1	1	16
166	Male	1999-01-26	24	YES	2	1	1	1	1	1	5	2	2	1	3	3	1	1	25
167	Male	2001-10-17	21	YES	1	3	1	1	1	1	1	1	1	1	1	1	1	1	16
168	Male	1997-02-07	26	YES	1	2	2	1	1	4	2	2	4	2	4	4	2	2	33
169	Female	1997-03-26	26	YES	4	3	5	4	4	5	3	3	5	5	5	4	4	5	59
170	Female	2003-10-29	20	YES	3	3	4	2	4	5	4	2	2	4	4	5	2	5	49
171	Female	2003-12-10	20	YES	2	2	4	2		4	3	4	5	2	4	4	3	4	43
172	Female	2005-03-10	19	YES	4	1	5	5	5	1	5	3	5	4	4	5	5	4	56
173	Female	2005-12-15	18	YES	4	3	4	4	2	4	5	5	5	4	2	4	2	2	50
174	Female	2004-06-17	20	YES	5	5	5	5	5	4	5	1	3	5	5	5	4	5	62
175	Female	2006-04-08	18	YES	5	4	4	1	1	2	1	2	4	2	2	4	2	2	36
176	Female	1997-06-02	26	YES	1	1	1	4	3	3	4	1	1	1	1	4	1	1	27
177	Female	2003-01-02	21	YES	2	2	1	1	2	2	4	1	4	2	2	4	1	2	30
178	Female	1998-05-30	25	YES	2	2	2	1	4	4	4	4	2	5	5	5	1	3	44
179	Female	2004-01-31	19	YES	3	3	3	3	3	3	3	3	3	4	4	3	3	3	44
180	Female	2003-09-26	20	YES	5	2	4	3	2	2	4	4	5	2	2	4	1	4	44
181	Male	2003-02-19	20	YES	5	3	4	3	2	5	5	4	4	4	4	4	3	5	55
182	Female	2000-10-14	22	No	2	3	3	1	4	5	3	1	5	5	5	5	1	3	46
183	Female	1993-10-14	29	YES	5	2	3	2	5	4	4	5	5	5	3	5	3	4	55
184	Female	2002-10-16	21	YES	1	2	1	1	1	1	1	1	1	4	4	1	1	3	23
185	Female	1991-10-09	31	YES	4	4	2	2	2	2	2	4	2	4	2	2	2	4	38
186	Female	2000-11-14	22	YES	2	1	1	2	1	2	2	4	2	2	2	2	2	2	27
187	Male	1993-08-31	30	YES	3	4	4	3	4	4	4	4	5	4	4	4	4	4	55
188	Male	1978-11-19	44	YES	2	2	2	2	2	1	2	1	1	3	3	4	3	3	31
189	Female	2004-07-10	19	YES	4	1	1	1	1	4	4	4	3	2	1	1	1	1	29
190	Male	1998-08-07	25	YES	2	3	2	1	1	2	1	1	2	3	2	3	1	2	26
191	Male	2004-08-31	19	YES	3	4	4	1	2	1	1	1	1	1	1	5	1	1	27
192	Male	2004-03-30	20	YES	2	1	3	1	1	3	5	2	4	4	4	5	2	1	38
193	Male	2004-03-19	20	YES	1	2	1	3	3	2	2	4	2	5	5	3	2	1	36
194	Male	2000-05-07	23	YES	4	1	3	4	2	4	4	5	4	4	4	5	4	4	52
195	Male	2001-06-01	22	YES	4	3	2	2	2	2	2	2	2	2	2	3	3	2	33
196	Male	2005-05-19	19	YES	2	2	3	4	3	3	2	3	4	3	2	3	3	3	40
197	Male	2007-06-13	17	YES	4	2	1	1	1	1	1	2	2	2	2	1	1	1	22
198	Male	1997-03-10	26	YES	3	2	1	1	1	4	4	1	4	2	1	3	1	1	29
199	Male	1976-11-18	46	YES	2	1	1	1	1	1	4	1	1	1	1	1	1	1	18
200	Male	1998-04-06	25	YES	2	1	1	2	4	2	2	1	2	2	1	2	2	3	27
201	Male	2008-02-12	16	YES	4	2	1	1	1	4	3	1	4	2	1	1	1	1	27
202	Male	2004-01-28	20	YES	2	1	1	1	1	1	1	1	4	2	4	1	1	1	22
203	Male	#none	0	YES	4	4	4	5	2	4	5	1	3	3	4	4	4	3	50
204	Female	2003-08-22	20	YES	2	2	5	2	5	5	2	5	5	5	5	5	5	5	58
205	Female	2005-09-02	18	YES	4	2	2	5	1	2	5	2	2	3	1	2	1	1	33
206	Male	1995-12-27	27	YES	2	2	2	1	2	1	2	1	2	1	2	2	1	1	22
207	Male	2002-07-02	21	YES	3	3	2	2	2	2	2	2	2	4	4	2	4	2	36
208	Male	2000-12-01	22	YES	2	3	2	1	1	1	2	1	4	2	1	4	2	2	28
209	Male	1999-02-23	24	YES	2	2	2	2	2	4	3	1	3	4	2	2	1	3	33
210	Male	1987-01-09	36	YES	4	1	1	1	1	1	1	1	1	1	1	1	1	1	17
211	Male	2005-03-31	19	YES	2	3	2	1	2	2	2	2	2	2	2	2	2	2	28
212	Male	2003-10-22	19	YES	2	2	2	2	2	2	3	4	3	1	3	3	3	3	35
213	Female	2004-12-16	19	YES	1	3	5	1	4	4	3	3	4	1	1	4	3	4	41
214	Female	2002-05-19	21	YES	2	4	4	3	2	3	4	2	2	4	2	2	2	2	38
215	Female	1996-05-14	27	YES	5	4	5	5	5	5	5	4	5	5	5	5	3	5	66
216	Female	2004-09-02	19	YES	1	1	1	1	1	1	1	1	1	1	1	1	1	1	14
217	Female	2005-10-28	18	YES	2	4	5	4	4	5	4	4	5	4	3	4	3	4	55
218	Female	2007-11-25	16	YES	1	2	1	1	1	1	2	1	3	1	2	3	1	2	22
219	Female	2005-10-27	18	YES	4	2	3	1	1	3	2	1	1	1	1	2	3	3	28
220	Female	1997-08-01	26	YES	4	3	2	2	2	2	4	2	2	2	2	2	2	2	33
221	Female	2006-11-29	17	YES	3	4	2	2	2	3	2	2	4	2	2	4	2	2	36
222	Female	2006-07-17	17	YES	3	2	2	2	2	4	4	2	4	2	4	4	2	2	39
223	Female	2003-08-28	20	YES	2	2	2	2	2	2	2	5	5	3	2	1	1	5	36
224	Female	2003-12-08	19	YES	1	1	1	1	1	1	1	1	2	2	2	1	2	1	18
225	Male	2005-06-18	19	No	1	1	1	1	1	1	1	1	1	1	1	1	1	1	14
226	Male	2000-06-20	23	YES	5	4	3	3	4	3	3	2	2	4	3	4	2	4	46
227	Male	1971-01-24	52	YES	2	4	4	4	4	2	4	5	4	4	4	5	5	5	56
228	Female	2002-12-05	21	YES	4	3	4	3	3	4	4	3	4	3	3	4	3	3	48
229	Male	1994-06-15	29	YES	1	1	1	1	1	1	1	1	1	1	1	1	1	1	14
230	Male	2006-08-04	17	YES	1	2	2	2	2	4	2	1	1	2	2	3	1	4	29
231	Female	1999-04-15	24	YES	2	5	2	3	5	5	2	5	5	5	5	5	2	5	56
232	Female	2004-04-03	20	YES	2	1	2	4	1	4	1	2	1	4	2	4	1	4	33
233	Female	1975-09-28	48	YES	1	4	1	1	1	1	5	5	5	1	1	1	1	1	29
234	Female	2000-10-25	22	YES	5	3	5	5	4	5	3	5	5	5	5	5	3	3	61
235	Female	1996-12-04	26	YES	2	2	2	1	1	1	1	1	3	1	1	1	1	1	19
236	Male	1996-02-03	27	YES	4	2	3	4	3	4	4	4	4	4	4	4	3	4	51
237	Male	2003-07-10	20	YES	1	1	1	1	1	1	1	1	1	1	1	1	1	1	14
238	Female	2006-04-12	18	YES	4	2	4	3	2	4	3	2	3	3	3	4	4	3	44
239	Female	1994-02-25	29	YES	1	2	1	1	1	1	1	1	1	1	1	1	1	1	15
240	Female	2002-04-27	22	YES	2	2	2	3	3	4	2	3	4	2	3	3	3	2	38
241	Female	1992-08-05	31	YES	3	3	1	1	1	2	2	2	2	2	2	1	1	1	24
242	Male	1996-12-22	26	YES	4	2	2	2	4	2	4	1	4	4	4	2	2	2	39
243	Male	1979-02-05	44	YES	3	1	1	2	1	1	1	4	3	4	2	4	2	3	32
244	Male	1980-01-15	43	YES	2	2	2	2	2	2	2	2	2	2	2	2	2	2	28
245	Male	1988-11-10	34	YES	2	2	1	2	2	2	4	4	2	2	2	2	1	1	29
246	Male	2000-09-18	23	YES	4	2	4	2	2	4	2	2	4	2	4	4	2	2	40
247	Male	2006-05-14	18	YES	4	2	2	3	3	3	2	4	4	3	4	2	2	3	41
248	#none	2004-05-28	20	YES	3	4	3	4	4	4	3	4	2	4	4	4	3	3	49
249	Male	1997-06-27	27	YES	5	1	4	5	1	5	1	1	5	5	3	5	4	5	50
250	Male	2000-03-18	23	YES	2	3	1	1	2	2	2	1	2	2	3	4	1	2	28
251	Male	2001-04-23	22	YES	1	1	1	1	1	1	1	1	1	1	1	1	1	1	14
252	Male	2005-04-27	19	YES	3	3	3	3	3	3	3	3	3	3	3	3	3	3	42
253	Male	2002-10-09	20	YES	1	2	4	1	5	1	5	5	5	1	4	1	5	1	41
254	Male	2003-08-27	20	YES	5	2	1	2	1	4	4	1	4	4	2	3	1	1	35
255	Male	2004-02-21	19	YES	2	3	2	1	3	3	4	1	3	3	3	2	3	3	36
256	Female	1994-11-29	28	YES	3	4	4	2	3	4	3	3	3	4	4	4	3	4	48
257	Female	2006-07-20	17	YES	5	3	5	5	2	5	5	5	5	5	5	5	4	5	64
258	Female	2004-12-21	19	YES	3	1	1	1	1	1	1	1	1	1	1	1	1	1	16
259	Male	2004-06-11	20	YES	3	3	3	2	2	2	2	2	2	2	2	2	2	2	31
260	Female	1997-05-02	26	YES	4	4	4	4	4	4	4	2	5	5	4	4	4	5	57
261	Female	2004-07-21	19	YES	2	3	3	2	2	2	2	2	4	4	2	4	2	4	38
262	Female	2003-04-14	20	YES	2	3	3	1	4	1	1	1	4	3	3	3	4	1	34
263	Female	2004-09-27	19	YES	4	4	2	1	1	2	1	1	4	3	2	4	2	3	34
264	Female	2005-07-24	18	YES	4	4	4	4	4	4	5	4	5	5	4	4	3	4	58
265	Female	2004-03-12	20	YES	1	1	1	1	1	1	1	1	1	2	1	1	1	1	15
266	Female	2003-04-05	21	YES	5	5	5	4	4	4	5	4	5	5	5	5	5	3	64
267	Female	1977-10-26	45	YES	4	4	3	2	2	3	3	4	4	3	4	4	3	4	47
268	Male	2004-04-25	20	YES	3	3	4	4	4	3	4	2	4	4	2	2	3	2	44
269	Male	2007-02-14	17	YES	4	4	3	2	1	2	4	2	4	2	2	4	1	2	37
270	Male	1973-05-13	50	YES	4	2	2	2	2	2	2	2	4	2	2	2	2	2	32
271	Female	1997-05-17	26	YES	5	5	3	5	1	1	3	4	2	5	5	5	1	1	46
272	Male	#none	0	YES	3	3	3	3	3	3	3	3	3	4	3	3	3	3	43
273	Female	2000-12-11	22	YES	2	2	2	2	4	3	4	1	4	2	2	4	1	2	35
274	Female	1991-01-15	32	YES	5	3	4	3	4	5	4	5	5	3	5	5	2	4	57
275	Female	2004-08-17	19	YES	4	4	2	5	4	5	4	4	4	3	1	4	1	3	48
276	Female	2003-04-19	20	YES	5	3	5	3	5	3	5	5	5	5	5	5	3	4	61
277	Female	2003-12-03	19	YES	1	1	1	1	1	1	1	4	5	4	1	2	1	4	28
278	Female	1992-09-12	31	YES	5	5	5	5	5	5	5	5	5	5	4	5	5	5	69
279	Male	1991-03-26	32	YES	2	4	2	4	2	2	2	5	5	5	2	2	2	2	41
280	Female	2003-05-15	21	YES	5	5	4	2	4	5	4		3	5	2	2	2	1	44
281	Female	2004-02-18	19	YES	4	3	4	3	2	5	2	4	4	3	4	5	3	3	49
282	Male	2003-10-27	19	YES	1	1	2	1	1	1	1	1	1	1	1	2	1	2	17
283	Male	1998-08-25	25	YES	4	1	4	2	1	2	4	1	1	1	1	2	1	1	26
284	Male	2006-08-22	17	YES	5	3	4	5	5	3	4	3	5	3	5	3	1	5	54
285	Male	1960-03-19	64	YES	5	5	3	2	4	4	4	5	5	5	5	5	4	5	61
286	Female	2002-01-15	21	YES	4	3	4	3	4	3	3	4	4	4	4	3	3	3	49
287	Female	1996-07-17	27	YES	2	1	1	4	3	1	2	1	2	2	4	4	1	1	29
288	Female	1998-03-30	25	YES	2	4	2	1	2	2	2	2	2	2	2	2	2	2	29
289	Female	#none	0	YES	5	3	4	4	3	4	3	2	4	5	4	5	2	1	49
290	Female	2004-05-24	20	YES	2	2	2	2	3	1	2	2	3	3	2	3	3	3	33
291	Female	2005-03-10	18	YES	5	4	5	4	5	4	5	5	5	5	5	4	5	5	66
292	Female	2001-02-08	22	YES	4	3	1	3	2	4	2	1	4	4	1	4	3	4	40
293	Male	2000-08-27	23	YES	1	4	1	1	1	4	2	1	1	4	2	4	1	1	28
294	Female	2001-03-13	22	YES	2	3	2	2	2	1	4	3	2	3	1	4	1	2	32
295	Female	2005-01-06	18	YES	5	1	4	1	1	1	1	4	1	1	1	1	1	1	24
296	Female	1999-11-14	23	YES	5	2	3	5	2	5	5	2	3	4	5	5	2	4	52
297	Male	1981-01-23	42	YES	1	1	1	1	1	1	1	1	1	1	1	1	1	1	14
298	Male	1996-04-04	27	YES	4	3	5	5	5	3	5	4	5	5	5	5	3	5	62
299	Male	2004-11-25	19	YES	4	3	4	3	4	1	3	4	4	4	4	4	2	2	46
300	Male	1996-05-12	27	YES	3	2	2	2	1	2	1	1	4	4	2	2	2	2	30
301	Male	2002-05-10	22	YES	1	1	1	1	1	1	1	4	1	3	1	1	1	2	20
302	Female	2000-06-03	23	YES	4	3	3	3	3	3	4	3	4	3	4	4	4	3	48
303	Female	2000-06-05	23	YES	3	2	2	2	2	4	4	1	2	3	1	4	1	4	35
304	Female	1994-12-01	28	YES	1	1	1	1	1	1	1	1	4	2	1	1	2	1	19
305	Female	1997-08-16	26	YES	2	2	2	3	3	1	1	1	1	1	1	1	1	1	21
306	Female	2004-07-02	20	YES	2	2	2	2	2	3	2	3	3	2	2	3	2	3	33
307	Female	2005-11-12	18	YES	4	3	2	4	4	4	3	4	3	4	2	5	1	4	47
308	Female	1976-09-28	47	YES	3	3	1	1	4	4	4	1	1	5	2	1	4	4	38
309	Female	2005-03-16	19	YES	2	3	4	1	1	3	1	4	4	4	3	3	2	4	39
310	Female	2005-04-04	19	YES	1	3	2	3	4	4	2	2	3	3	4	3	4	3	41
311	Female	2002-06-17	21	YES	3	1	4	2	1	5	4	3	5	2	5	4	1	4	44
312	Male	1999-09-09	24	YES	2	2	2	1	3	1	1	2	2	4	2	1	3	2	28
313	Female	1997-04-21	26	YES	3	3	2	2	3	4	4	3	3	5	2	3	3	3	43
314	Female	#none	0	No	3	2	3	2	3	2	2	1	3	3	3	2	1	2	32
315	Female	2006-10-19	17	YES	5	4	5	5	5	1	4	1	4	5	3	3	3	5	53
316	Female	1998-08-27	25	YES	2	2	2	1	3	2	2	3	3	2	2	1	2	2	29
317	Female	2005-08-11	18	YES	1	1	2	1	1	2	5	3	4	3	2	2	1	2	30
318	Female	#none	0	YES	2	2	2	4	1	5	5	1	2	1	1	3	1	2	32
319	Male	1997-03-03	26	YES	2	1	2	3	1	3	4	4	4	3	3	4	1	1	36
320	Male	2005-07-05	19	YES	3	4	4	3	3	5	4	4	5	5	5	4	3	3	55
321	Male	2006-09-18	17	YES	2	1	1	2	1	2	1	1	2	1	2	1	1	2	20
322	Male	2006-03-28	17	YES	1	5	5	3	3	3	3	1	1	1	5	5	5	3	44
323	Male	1999-12-20	23	YES	4	1	1	4	1	4	4	1	4	1	1	4	1	1	32
324	Male	1999-02-18	24	YES	4	4	2	4	1	1	1	1	1	4	1	5	1	1	31
325	Male	2004-03-17	20	YES	4	4	3	2	2	2	2	2	2	2	2	2	4	2	35
326	Male	2000-08-09	23	YES	2	2	4	4	3	4	3	2	2	4	4	4	3	4	45
327	Male	1999-01-14	24	YES	2	1	1	4	1	1	2	1	1	3	1	3	2	2	25
328	Male	2002-10-21	20	YES	1	1	1	1	1	1	1	1	1	1	1	1	1	1	14
329	Male	2002-12-18	20	YES	2	1	2	2	2	2	4	2	3	2	2	1	3	2	30
330	Male	2006-08-24	17	YES	4	4	1	2	1	4	3	1	4	4	2	4	2	2	38
331	Male	2007-02-01	17	No	2	1	4	1	1	1	1	1	3	3	4	1	1	4	28
332	Male	2008-01-30	16	YES	1	1	1	1	1	1	1	1	1	1	1	1	1	1	14
333	Male	2003-04-27	20	YES	2	1	3	2	2	1	3	1	1	1	3	2	1	3	26
334	Female	1995-10-21	27	YES	1	4	3	1	1	4	4	4	3	3	2	2	2	4	38
335	Female	1995-05-12	28	YES	5	4	5	3	2	5	5	5	5	4	1	5	2	3	54
336	Male	1974-07-09	49	YES	2	2	2	2	2	2	2	4	4	2	2	2	2	2	32
337	Female	1981-11-21	41	YES	2	4	4	2	4	4	3	2	2	4	4	5	3	4	47
338	Female	1979-10-02	43	YES	3	1	4	5	5	5	2	5	5	3	5	5	5	5	58
339	Female	1998-03-08	25	YES	1	1	5	1	5	3	1	1	5	1	1	1	2	4	32
340	Male	2001-03-09	22	YES	1	1	1	1	1	1	1	1	1	1	1	1	1	1	14
341	Male	2001-05-14	22	YES	1	1	1	1	1	1	1	1	1	1	4	1	1	1	17
342	Male	2000-03-09	23	YES	1	1	1	1	1	1	1	1	1	1	1	1	1	1	14
343	Female	2004-12-15	19	YES	2	1	2	2	1	1	2	1	2	2	2	2	2	2	24
344	Female	2004-08-28	19	YES	4	2	2	3	2	4	2	2	4	4	2	3	2	4	40
345	Male	2001-09-04	22	YES	1	1	1	1	1	1	1	1	1	1	1	1	1	1	14
346	Male	2007-01-24	17	YES	2	4	4	2	2	2	2	1	4	4	2	1	2	2	34
347	Female	#none	0	YES	1	2	1	1	1	1	1	1	1	2	2	1	1	3	19
348	Male	1978-08-08	45	YES	5	5	4	5	4	4	5	4	4	5	5	5	5	5	65
349	Male	2003-08-25	20	YES	2	1	1	3	4	1	2	1	2	4	1	1	1	1	25
350	Male	2003-04-01	20	YES	1	1	1	1	1	1	1	1	1	1	1	1	1	1	14
351	Male	1975-01-01	49	YES	2	1	2	2	1	2	2	1	2	3	1	4	2	2	27
352	Male	2004-01-06	20	YES	4	5	4	5	4	4	4	3	3	5	5	4	4	5	59
353	Female	2004-02-12	20	YES	4	3	4	4	5	4	3	2	3	3	3	4	2	4	48
354	Female	2003-07-10	20	YES	3	4	1	3	2	3	5	2	2	4	3	2	1	2	37
355	Female	1988-02-15	36	YES	4	4	5	4	3	5	5	4	5	5	5	5	4	4	62
356	Female	2004-12-13	19	YES	4	2	2	3	1	5	3	4	4	4	2	4	1	1	40
357	Female	2006-01-10	18	YES	1	1	1	1	1	5	5	5	5	4	1	1	1	2	34
358	Female	2003-04-06	20	YES	2	1	1	1	1	2	3	2	3	2	1	2	1	1	23
359	Female	2007-05-12	17	YES	1	1	1	1	1	1	1	1	1	1	1	1	1	1	14
360	Female	2005-03-19	19	YES	4	2	3	2	1	4	2	4	3	3	2	4	1	3	38
361	Female	2006-01-30	18	YES	3	4	3	2	2	4	3	3	4	5	4	4	3	2	46
362	Female	2005-05-21	18	YES	4	4	4	2	4	4	4	2	4	4	2	4	3	2	47
363	Female	2007-06-13	17	YES	3	2	4	2	2	2	3	4	2	3	2	2	2	4	37
364	Female	1970-10-16	52	YES	4	4	3	3	3	3	3	4	4	3	4	3	3	3	47
365	Female	2003-05-10	21	YES	2	3	5	3	2	1	5	2	4	5	4	4	2	3	45
366	Female	1959-10-18	63	YES	1	1	2	1	1	1	1	1		1	1	1	1	1	14
367	Female	1972-09-23	51	YES	3	3	3	3	3	3	3	3	3	3	3	3	3	3	42
368	Female	2001-04-19	22	YES	2	2	2	2	2	4	2	2	4	4	2	4	2	4	38
369	Female	1999-02-11	24	YES	3	4	2	1	1	2	3	1	3	2	1	2	1	2	28
370	Female	1996-04-24	27	YES	5	4	4	3	2	4	4	4	5	4	2	5	5	4	55
371	Female	1997-11-18	25	YES	2	4	3	2	1	1	3	1	4	1	2	2	1	1	28
372	Female	2006-03-22	18	YES	5	3	4	2	4	5	5	3	4	3	4	5	1	2	50
373	Female	1971-07-06	53	YES	1	1	1	1	1	1	1	1	1	1	1	1	1	1	14
374	Female	1999-07-19	24	YES	2	2	2	2	2	2	2	2	2	2	2	2	2	2	28
375	Female	1959-05-08	64	YES	4	2	2	2	2	3	2	1	1	1	1	1	1	1	24
376	Female	2004-01-15	20	YES	2	1	3	1	1	1	1	1	1	4	3	2	1	3	25
377	Female	1985-09-18	38	YES	5	1	1	5	1	5	5	5	5	5	3	5	5	5	56
378	Male	1998-01-14	25	YES	3	5	1	1	1	5	5	5	3	5	3	5	3	4	49
379	Male	2003-07-10	20	YES	4	3	3	4	4	3	3	3	4	4	3	3	3	4	48
380	Male	1994-10-23	28	YES	1	1	1	1	1	1	1	1	4	1	1	1	5	1	21
381	Male	2002-04-06	22	YES	1	1	1	1	1	1	1	1	1	1	1	1	1	1	14
382	Male	1998-08-21	25	YES	3	3	3	3	3	3	3	3	1	3	1	1	3	3	36
383	Male	2001-07-02	22	YES	1	2	1	1	1	1	1	1	5	1	1	1	1	1	19
384	Male	2006-07-26	17	YES	3	3	3	3	3	3	3	3	3	3	3	3	3	3	42
385	Male	1995-09-09	28	YES	4	4	4	2	3	4	4	4	4	4	4	4	4	4	53
386	Male	#none	0	YES	2	2	1	4	3	4	2	2	3	4	2	2	1	4	36
387	Male	2002-08-10	21	YES	2	2	2	2	2	4	2	2	4	2	3	2	2	2	33
388	Male	2004-09-30	19	YES	2	3	3	2	1	3	4	4	4	4	4	3	2	2	41
389	Male	2004-02-04	20	YES	1	1	1	1	1	2	1	1	2	3	1	2	1	2	20
390	Male	2000-10-16	22	YES	3	3	2	4	1	2	3	1	1	3	3	2		1	29
391	Male	2002-03-13	21	YES	4	2	4	1	1	4	4	5	4	4	4	4	4	4	49
392	Male	2003-05-28	21	YES	2	1	1	1	1	1	3	4	5	2	1	1	2	3	28
393	Male	2002-04-05	21	YES	1	1	1	1	1	1	1	1	1	1	1	1	1	1	14
394	Male	1998-11-26	24	YES	5	1	1	1	1	2	2	4	4	5	4	4	3	3	40
395	Male	2007-01-03	17	YES	2	1	1	3	2	4	4	3	4	4	4	4	2	3	41
396	Male	2001-03-23	22	YES	2	2	3	2	1	3	2	3	2	4	3	4	4	3	38
397	Male	2001-03-04	22	YES	4	4	1	1	1	1	1	1	3	1	1	1	1	1	22
398	Female	1994-04-04	29	YES	1	1	2	2	2	1	1	1	1	1	1			1	15
399	Male	2005-01-03	19	YES	4	2	2	2	2	4	4	2	2	4	4	4	4	4	44
400	Female	2000-01-27	23	YES	1	1	1	1	1	1	1	1	1	1	1	1	1	1	14
401	Female	1997-06-25	26	YES	1	1	1	1	1	1	1	1	1	1	1	1	1	1	14
402	Female	2005-08-23	18	YES	2	1	1	2	1	4	1	1	4	3	4	3	1	1	29
403	Female	1990-08-17	33	YES	4	3	2	4	2	3	2	2	3	3	3	2	3	2	38
404	Female	1993-02-03	30	YES	2	2	2	2	2	2	2	2	2	2	2	2	2	2	28
405	Female	1990-09-10	33	YES	3	2	3	2	2	1	1	1	1	1	1	1	1	1	21
406	Female	#none	0	YES	2	2	2	5	2	2	2	1	3	1	4	4	4	2	36
407	Female	1996-12-22	26	YES	1	1	1	1	1	1	1	1	1	1	1	2	1	1	15
408	Female	2000-09-25	23	YES	2	1	1	2	1	2	2	4	2	4	1	1	1	3	27
409	Female	2001-08-27	22	YES	3	2	2	2	2	4	4	3	4	3	4	4	4	2	43
410	Female	2001-09-13	22	YES	2	1	1	1	1	1	5		1	5	4	3	1	1	27
411	Female	2007-04-15	17	YES	4	1	4	1	1	4	1	1	1	1	4	1	1	1	26
412	Female	1999-06-12	24	YES	4	4	2	2	2	4	4	2	4	5	4	5	4	4	50
413	Female	1999-06-12	24	YES	4	3	4	3	2	2	4	2	4	3	3	4	3	4	45
414	Male	2004-12-08	19	YES	1	2	3	1	1	1	1	1	1	2	1	1	1	2	19
415	Female	2003-02-28	20	YES	4	2	4	3	2	5	5	3	5	4	1	5	3	3	49
416	Male	1960-05-24	63	YES	2	1	2	1	1	1	3	2	1	4	4	2	2	2	28
417	Female	2000-09-10	23	YES	5	1	1	1	1	1	1	1	1	1	3	1	1	1	20
418	Male	2003-01-04	21	YES	2	1	1	2	1	1	1	1	1	1	1	1	1	1	16
419	Male	2002-05-08	21	YES	4	5	4	2	4	3	4	3	4	4	4	4	4	4	53
420	Male	2003-01-07	20	YES	5	3	1	3	4	5	5	3	4	3	5	5	2	5	53
421	Female	1999-01-09	24	YES	2	3	4	2	2	3	4	4	4	4	2	4	4	4	46
422	Female	1996-01-16	28	YES	4	4	4	4	4	4	4	4	4	4	4	4	4	4	56
423	Female	2001-06-22	22	YES	2	2	1	2	2	3	2	1	2	2	1	2	1	1	24
424	Female	1999-11-12	23	YES	3	4	3	2	3	3	4	4	4	4	2	4	1	4	45
425	Male	2004-05-05	20	YES	3	1	2	3	3	2	1	1	1	2	1	2	1	2	25
426	Male	2007-01-10	17	YES	2	2	3	2	2	2	2	2	3	2	2	1	2	2	29
427	Male	1996-11-13	26	YES	3	2	4	3	2	5	3	4	3	5	2	5	1	3	45
428	Male	1988-04-10	35	YES	4	3	3	3	3	3	4	3	4	3	3	4	4	3	47
429	Male	1996-08-14	27	YES	2	3	2	2	2	2	2	2	2	2	2	2	2	2	29
430	Male	2004-01-23	20	YES	1	1	1	1	1	1	1	1	1	1	1	1	1	1	14
431	Male	1998-03-03	25	YES	5	3	2	1	1	3	1	1	1	1	1	3	1	2	26
432	Male	2006-02-12	18	YES	2	1	1	1	1	1	1	1	1	1	1	1	1	1	15
433	Male	2004-11-18	18	YES	1	3	4	4	1	1	4	2	2	3	5	1	3	1	35
434	Male	2003-07-05	20	YES	1	2	1	1	1	1	2	2	2	3	2	3	2	1	24
435	Male	2000-10-21	22	YES	3	2	2	2	2	2	2	2	2	2	3	2	2	2	30
436	Male	1995-12-28	27	YES	3	3	3	2	1	2	4	2	4	4	2	3	2	3	38
437	Male	2007-02-05	17	YES	4	2	2	2	2	2	3	1	1	1	1	4	1	1	27
438	Male	2008-01-09	16	YES	1	1	1	1	1	1	1	1	4	1	1	1	1	1	17
439	Male	1988-01-06	35	YES	3	2	4	2	3	3	2	3	2	3	2	2	3	3	37
440	Male	1998-09-10	25	YES	2	2	2	1	2	2	4	1	3	1	1	2	1	2	26
441	Female	1980-04-22	44	YES	2	2	2	2	2	2	2	2	2	2	2	2	2	2	28
442	Male	2005-09-20	18	YES	4	1	1	1	1	4	4	3	5	4	1	5	1	3	38
443	Male	2002-11-07	20	YES	1	1	1	1	1	2	2	1	1	1	1	2	1	1	17
444	Male	2001-11-28	21	YES	1	1	1	1	1	1	1	1	1	5	1	1	1	1	18
445	Male	#none	0	YES	2	4	1	1	1	1	2	1	2	2	2	1	2	2	24
446	Male	2007-10-18	16	YES	4	2	3	1	4	4	2	1	1	3	2	4	2	1	34
447	Male	2002-01-30	21	YES	2	1	2	1	1	1	1	1	2	1	1	2	1	1	18
448	Female	1983-09-01	40	YES	1	2	4	2	1	1	4	1	3	4	1	2	1	3	30
449	Female	2005-12-06	18	YES	4	2	4	4	3	4	4	3	4	3	4	4	2	4	49
450	Female	2004-05-11	20	YES	3	4	2	3	4	2	4	4	4	5	2	2	4	4	47
451	Female	2007-05-23	17	YES	5	2	4	2	1	5	3	4	4	3	2	4	1	4	44
452	Female	1996-11-11	26	YES	2	4	2	2	2	4	4	3	4	2	2	4	2	2	39
453	Female	2004-05-21	19	YES	4	2	2	2	2	4	2	4	4	2	2	4	2	4	40
454	Male	#none	0	YES	2	3	1	1	1	4	2	1	2	3	1	1	1	1	24
455	Male	2004-04-26	20	YES	3	4	2	2	2	2	2	4	2	5	4	2	2	4	40
456	Female	2004-07-19	19	YES	1	1	2	2	1	1	1	1	3	2	4	1	1	1	22
457	Female	1999-06-05	24	YES	3	5	1	2	4	1	4	1	4	5	5	1	1	5	42
458	Female	1996-09-13	27	YES	1	1	1	1	1	1	1	5	5	1	1	1	1	5	26
459	Female	2007-03-08	17	YES	2	4	2	2	2	2	2	2	2	2	2	2	2	2	30
460	Female	2003-11-20	20	YES	1	2	1	1	1	1	1	1	1	1	1	2	1	3	18
461	Female	1969-08-07	54	YES	4	4	3	2	2	2	2	1	4	4	1	2	1	2	34
462	Female	1996-05-13	27	YES	4	3	4	4	3	4	5	3	5	4	3	5	2	3	52
463	Male	2007-04-10	17	No	1	1	1	1	1	1	1	1	1	1	1	1	1	1	14
464	Female	1993-10-26	29	YES	3	2	4	2	2	1	2	2	3	2	3	2	3	2	33
465	Female	1999-07-23	24	YES	4	2	4	2	2	2	5	2	1	2	1	2	1	1	31
466	Male	2003-05-15	21	YES	3	3	4	3	4	5	4	4	5	5	3	3	2	3	51
467	Female	2003-12-03	20	YES	4	2	3	2	2	1	1	1	1	4	1	2	3	3	30
468	Female	1994-03-05	30	YES	3	2	5	2	2	2	2	2	2	2	4	2	2	2	34
469	Male	2000-09-26	23	No	2	2	5	2	2	2	3	1	2	2	5	3	3	3	37
470	Male	2004-01-30	20	YES	1	2	1	1	1	3	3	1	2	2	1	2	1	1	22
471	Male	1997-06-08	26	YES	2	2	2	2	2	3	2	2	3	4	2	2	2	2	32
472	Male	1998-11-08	24	YES	3	4	4	2	2	3	2	2	4	4	3	4	2	3	42
473	Male	2004-04-16	20	YES	5	4	3	4	4	5	5	2	4	5	3	5	2	5	56
474	Male	1982-03-15	41	YES	4	5	4	3	4	5	4	5	5	5	4	4	4	5	61
475	Female	1983-11-26	39	YES	2	2	2	2	2	4	4	4	2	4	4	2	2	4	40
476	Male	1997-09-06	26	YES	2	2	2	2	2	2	2	2	2	2	2	2	2	2	28
477	Male	2001-11-16	21	No	2	4	1	1	1	1	2	2	2	2	2	2	3	3	28
478	Female	1969-05-06	55	YES	2	2	2	1	1	1	1	1	1	2	1	2	1	1	19
479	Male	2005-04-05	19	YES	1	1	1	1	1	1	1	1	1	1	1	1	1	1	14
480	Male	2005-11-16	18	YES	4	2	2	2	2	2	2	2	2	2	2	4	2	2	32
481	Female	2006-10-19	17	YES	2	3	1	3	3	5	5	5	4	5	5	5	1	5	52
482	Female	2004-06-07	20	YES	3	1	1	1	1	2	2	1	2	2	1	2	1	2	22
483	Male	1981-07-19	42	YES	3	2	4	3	1	2	1	3	1	4	2	4	3	1	34
484	Female	2003-08-11	20	YES	5	4	4	3	4	4	3	5	5	5	5	4	3	3	57
485	Female	2003-06-03	20	YES	3	2	2	2	1	4	2	1	4	3	1	4	1	2	32
486	Female	1989-10-02	34	YES	3	2	2	2	2	1	1	4	4	3	1	1	1	1	28
487	Female	1997-10-14	25	YES	4	3	5	4	4	4	5	4	4	4	4	4	3	4	56
488	Female	2007-04-11	17	YES	4	3	4	2	2	4	4	4	4	3	4	3	2	4	47
489	Female	1998-04-13	25	YES	1	1	1	1	1	1	1	1	1	1	1	1	1	1	14
490	Female	2004-05-31	20	YES	2	3	2	4	4	2	4	5	2	4	3	2	3	4	44
491	Female	2003-09-01	20	YES	4	3	4	3	4	4	4	4	3	3	4	4	2	4	50
492	Female	1996-12-20	26	YES	4	1	5	2	1	5	5	5	5	5	5	4	3	1	51
493	Male	2004-06-26	20	YES	2	4	2	2	2	2	2	1	4	5	2	4	2	3	37
494	Male	1996-08-12	27	YES	3	1	1	4	5	4	3	1	2	2	1	5	1	3	36
495	Male	2005-12-08	18	YES	5	3	4	4	2	4	2	2	5	4	5	4	1	4	49
496	Female	1994-10-04	28	YES	2	2	2	2	4	4	4	4	5	5	5		5	4	48
497	Female	2007-01-27	17	YES	5	4	5	5	3	3	5	1	5	4	3	5	3	5	56
498	Female	2007-10-03	16	YES	4	3	4	2	4	2	4	3	4	4	2	2	2	2	42
499	Female	2005-04-11	19	YES	5	5	5	4	4	5	5	3	5	5	5	5	5	5	66
500	Female	1995-02-15	29	YES	1	4	1	1	1	1	1	1	4	4	1	4	4	4	32
501	Female	2008-02-27	16	YES	4	4	5	4	2	2	4	4	4	4	2	5	2	4	50
502	Female	2004-10-10	19	YES	3	4	2	2	3	2	3	2	3	3	3	3	2	4	39
503	Female	2007-07-04	17	YES	4	3	1	3	4	1	3	5	3	2	4	3	5	5	46
504	Female	2005-03-12	18	YES	2	3	2	4	1	1	2	5	5	4	1	2	1	1	34
505	Female	2006-07-11	17	YES	3	4	3	1	3	1	1	1	1	1	1	1	1	1	23
506	Female	#none	0	YES	4	1	1	2	2	5	2	2	3	4	2	5	2	4	39
507	Female	1980-12-31	43	YES	3	3	3	3	3	3	4	3	4	3	3	4	3	3	45
508	Female	1993-12-27	29	YES	4	2	1	1	3	3	4	1	4	2	4	4	1	4	38
509	Female	1995-10-04	27	YES	5	1	5	5	4	5	4	4	4	5	5	5	4	4	60
510	Female	1995-07-17	28	YES	5	5	4	4	5	5	5	4	5	5	5	5	3	4	64
511	Female	1997-03-05	27	YES	4	2	4	2	2	5	5	2	5	4	2	4	2	4	47
512	Male	#none	0	YES	1	2	1	1	1	1	1	1	1	1	1	1	1	1	15
513	Female	2006-08-16	17	YES	4	3	2	2	3	4	3	3	4	3	3	4	3	4	45
514	Female	2004-10-11	18	YES	4	4	2	2	4	2	2	2	2	4	4	2	2	2	38
515	Female	2002-12-05	20	YES	3	4	3	2	3	4	3	2	4	5	4	4	3	4	48
516	Male	1996-05-20	27	YES	4	2	2	2	2	2	2	1	1	1	2	1	1	1	24
517	Male	1996-02-04	28	YES	2	2	4	4	2	2	4	2	4	4	2	4	2	4	42
518	Male	2001-12-03	21	YES	4	4	4	4	4	4	4	4	4	4	4	4	4	4	56
519	Male	2003-10-23	20	YES	1	1	1	1	1	1	1	1	1	1	1	1	1	1	14
520	Male	1986-12-02	36	YES	3	2	2	3	3	3	3	3	3	3	3	2	2	3	38
521	Male	2000-08-03	23	YES	5	4	4	4	4	5	4	5	5	5	5	5	5	5	65
522	Male	1996-11-01	26	YES	2	4	1	1	1	1	4	1	4	4	1	1	1	1	27
523	Male	2005-03-11	19	YES	2	2	2	2	2	2	2	2	2	2	2	2	2	4	30
524	Male	2005-06-07	19	YES	1	1	1	2	1	1	1	4	5	2	3	4	1	3	30
525	Male	1996-11-10	26	YES	1	1	1	1	1	1	4	1	1	1	1	3	4	5	26
526	Male	1981-03-22	42	YES	1	1	1	1	1	1	1	1	1	1	1	1	1	1	14
527	Female	1995-06-27	28	YES	5	3	4	5	3	5	5	5	5	5	5	5	5	4	64
528	Female	2001-06-22	22	YES	2	1	1	2	1	4	2	2	2	4	2	2	2	3	30
529	Male	2001-11-19	21	YES	4	2	2	1	1	5	4	1	5	4	5	5	2	1	42
530	Male	1999-01-06	24	YES	1	3	4	2	2	1	2	1	1	4	2	1	2	2	28
531	Male	2004-03-07	20	YES	2	4	1	1	2	4	4	3	2	5	2	3	2	4	39
532	Male	2003-09-30	20	YES	2	3	1	1	1	2	1	1	1	1	1	4	1	1	21
533	Male	2004-07-12	19	No	2	1	2	2	1	3	2	1	1	1	1	1	1	1	20
534	#none	2005-05-13	19	YES	3	3	3	3	3	3	3	3	3	3	3	3	3	3	42
535	Male	2004-04-14	20	YES	4	3	3	4	3	4	3	2	2	3	2	3	2	1	39
536	Male	2008-04-28	16	No	3	4	2	4	4	2	4	2	4	4	4	4	4	2	47
537	Female	2000-05-29	23	YES	5	3	4	4	3	2	5	4	5	3	1	5	1	3	48
538	Female	2004-01-10	19	YES	2	4	2	1	1	1	2	1	4	1	2	2	1	2	26
539	Male	1999-06-04	24	YES	1	1	1	1	1	1	1	1	1	1	1	1	1	1	14
540	Male	1984-01-15	40	YES	3	1	4	1	4	4	4	4	4	4	5	4	4	5	51
541	Female	1976-09-04	47	YES	5	5	5	5	5	3	5	3	5	3	5	5	5	3	62
542	Male	2001-08-23	22	YES	4	1	2	3	3	4	4	2	4	2	4	4	2	2	41
543	Female	1998-07-09	25	YES	2	2	1		1	1	1	1	1	2	1	1	2	1	17
544	Male	2003-04-17	21	YES	1	1	1	1	1	1	1	1	1	1	1	1	1	1	14
545	Female	1988-06-10	36	YES	5	3	5	5	4	5	5	5	5	4	5	5	5	5	66
546	Male	2004-11-22	19	YES	1	1	1	1	1	1	1	1	1	1	1	1	1	1	14
547	Female	1988-10-04	34	YES	2	3		1	1	1	1	1	2	1	1	2	1	1	18
548	Female	1999-08-10	24	YES	1	1	3	1	1	1	1	3	1	1	1	1	1	1	18
549	Female	2000-04-28	23	YES	4	4	4	3	3	3	3	5	5	5	4	4	3	4	54
